# Supplementary material for: Mitochondrial Transplantation Therapy Ameliorates Muscular Dystrophy in mdx Mouse Model
Source: MDPI journal article supplement (doi:10.3390/biom14030316), 2024-03-07
Supplement: s1 [file s1]

Article

# Supplementary Material: Mitochondrial Transplantation Therapy Ameliorates Muscular Dystrophy in *mdx* Mouse Model

Mikhail V. Dubinin, Irina B. Mikheeva, Anastasia E. Stepanova, Anastasia D. Igoshkina, Alena A. Cherepanova, Alena A. Semenova, Vyacheslav A. Sharapov, Igor I. Kireev, Konstantin N. Belosludtsev

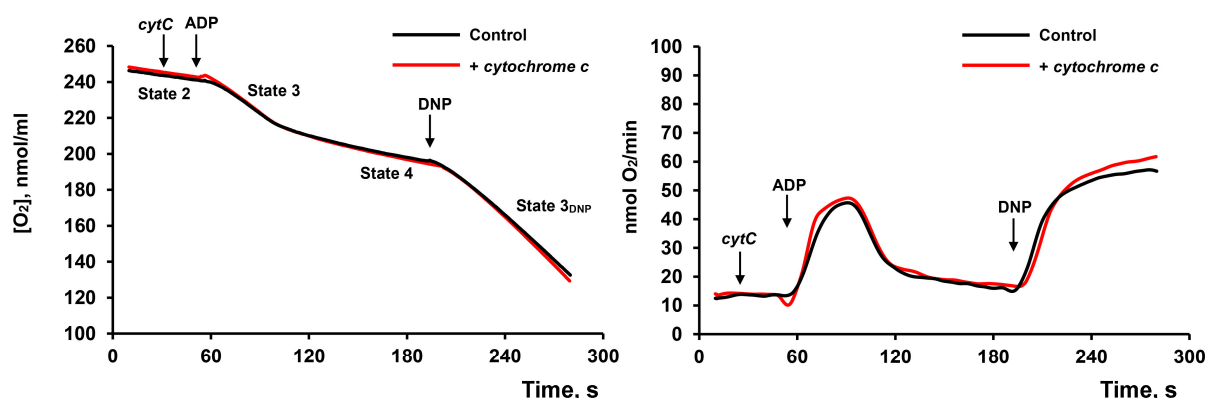

**Fig. S1.** Typical curves of oxygen consumption by skeletal muscle mitochondria fueled by glutamate+malate in the absence (control) or presence of 10  $\mu$ M cytochrome *c* (*cytC*). Medium composition: 120 mM KCl, 5 mM  $\text{NaH}_2\text{PO}_4$ , 2.5 mM potassium malate, 2.5 mM potassium glutamate, and 10 mM HEPES-KOH (pH 7.4). Additions: 200  $\mu$ M ADP, 50  $\mu$ M DNP.

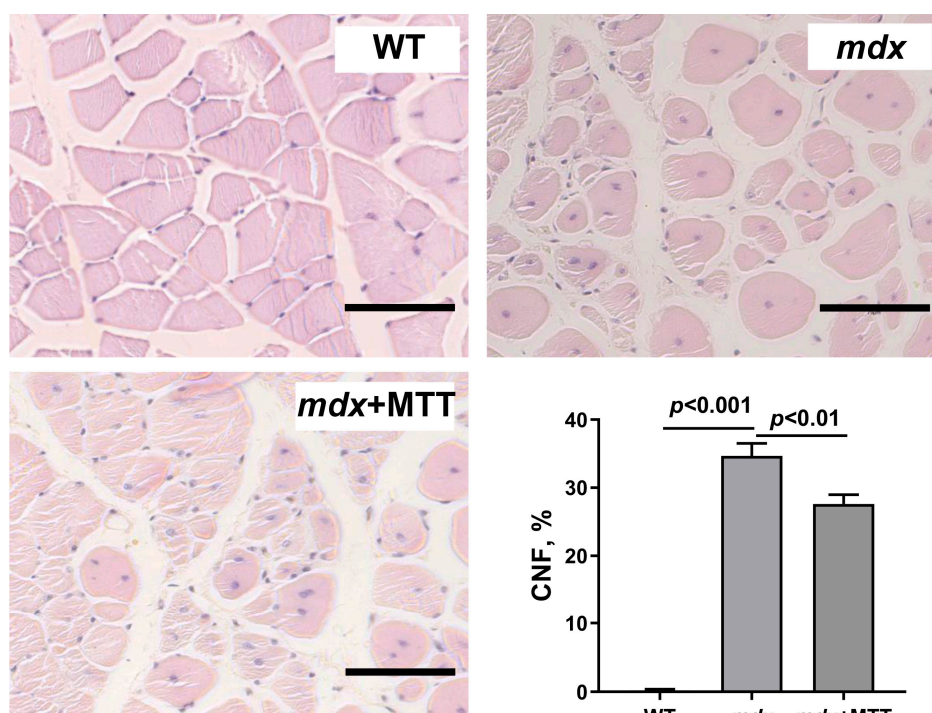

**Fig. S2.** Representative histology images of gastrocnemius muscles (H&E staining) and the percentage of CNF in the gastrocnemius of experimental animals. Scale bar is 75  $\mu$ m. The data are presented as means  $\pm$  SEM ( $n=4$ ).

**Table S1.** Parameters of respiration and oxidative phosphorylation of WT mice skeletal muscle mitochondria used for MTT

| additions     | V respiration, nmol O <sub>2</sub> /min per 1 mg of protein |            |          |                         | RCR     |
|---------------|-------------------------------------------------------------|------------|----------|-------------------------|---------|
|               | State 2                                                     | State 3    | State 4  | State 3U <sub>DNP</sub> |         |
| control       | 24.8±0.4                                                    | 134.5±1.3  | 31.4±0.6 | 191.6±5.1               | 4.3±0.2 |
| + <i>cytC</i> | 25.6±0.8                                                    | 146.3±2.5* | 33.3±1.3 | 211.4±4.3*              | 4.4±0.2 |

Mitochondria respiration was fueled by 2.5 mM glutamate and 2.5 mM malate. State 3 respiration was initiated by 200 µM ADP. The results are presented as means ± SEM ( $n = 20$  (control) and  $n = 8$  (*cytC*). \*  $p < 0.01$  versus control.
